# Supplementary material
Source: PubMed Central journal article supplement (PMC2653457)
Supplement: NIHMS82443-supplement-01.pdf [file NIHMS82443-supplement-01.pdf]

## Supplementary Data

### *Design of the $\alpha$ -Gliadin Synthetic Peptide Library*

MVRVPVPLQLPQNPSQQHPQ **peptide 4012**  
 PQNPSQQHPQEQVPLVQQQQ **peptide 4013**  
 EQVPLVQQQQFLGQQQSFP **peptide 4014**  
 FLGQQQSFPQQPYQPQP **peptide 4015**  
 QQPYQPQPFPSSQQPYLQLQ **peptide 4016**  
 PSQQPYLQLQFPQPQLPYL **peptide 4017**  
 PFPQPQLPYLQPQFRPQQP **peptide 4018**  
 QPQFRPQQPYQPQPQYSQ **peptide 4019**  
 YPQPQPQYSQPQQPISQQQQ **peptide 4020**  
 PQQPISQQQQQQQQQQQQQQ **peptide 4021**  
 QQQQQQQQQQQQQQQQQQQ -  
 QQQQQQQQQQQQQILQQILQQ **peptide 4022**  
 QQILQQILQQQLIPCMDVVL **peptide 4023**  
 QLIPCMDVVLQQHNIAHGRS **peptide 4024**  
 QQHNIAHGRSQVLQQSTYQL **peptide 4025**  
 QVLQQSTYQLLQELCCQHLW **peptide 4026**  
 LQELCCQHLWQIPEQSQCQA **peptide 4027**  
 QIPEQSQCQAIHNVVHAIL **peptide 4028**  
 IHNVVHAILHQQQKQQQQP **peptide 4029**  
 HQQQKQQQQPSSQVSFQQPL **peptide 4030**  
 SSQVSFQQPLQQYPLGGSF **peptide 4031**  
 QQYPLGGSFRPSQQNPLAQ **peptide 4032**  
 RPSQQNPLAQGSVQPQQLPQ **peptide 4033**  
 GSVQPQQLPQFEEIRNLALQ **peptide 4034**  
 FEEIRNLALQTLPAMCNVYI **peptide 4035**  
 TLPAMCNVYIPPYCTIVPFG **peptide 4036**  
 PPYCTIVPFGIFGTNYR **peptide 4037**

### *Radiolabeled CXCR3 Binding Assay*

Briefly, for the binding assay, radiolabeled [<sup>125</sup>I]-TAC (0.04 nmol/L; Perkin Elmer, Waltham, MA) and increasing concentrations of competitors (PT-gliadin or  $\alpha$ -gliadin synthetic peptides) were suspended in binding buffer (25 mmol/L HEPES [pH 7.4], 5 mmol/L MgCl<sub>2</sub>, 1 mmol/L CaCl<sub>2</sub>, 0.5% BSA [protease free], 10  $\mu$ g/mL saponin). Membranes from CHO-K1 cell lines expressing CXCR3 (2  $\mu$ g of protein/well) and appropriate controls (Perkin Elmer) were prepared, added to the suspension, and incubated for 60 minutes at 25 °C. After incubation, the reaction was stopped by rapid filtration on a GF/B Unifilter plate (Perkin Elmer) and saturated with 0.5% poly-ethylimine, using a Multiprobe (Perkin Elmer). Filters were washed 6 times with 500  $\mu$ L ice-cold filtration buffer (25 mmol/L HEPES [pH 7.4], 5 mmol/L MgCl<sub>2</sub>, 1 mmol/L CaCl<sub>2</sub>, 0.5 mol/L NaCl) and air-dried. MicroS-inct 20 (50  $\mu$ L; Packard) was added to each well, and, after incubation for 15 minutes on an orbital shaker, the plate was read in a TopCount (Perkin Elmer). Prior to the testing of compounds, reference compounds were tested

at several concentrations in duplicate to obtain a concentration-response curve and estimated EC<sub>50</sub> and/or IC<sub>50</sub> values.

### *Calcium Assay*

To establish whether PT-gliadin binding to CXCR3 led to activation of the Ca<sup>2+</sup> signaling, a functional assay based on the luminescence of mitochondrial aequorin after intracellular Ca<sup>2+</sup> release<sup>1</sup> was performed as previously described<sup>2</sup> (see also Euroscreen Web site; [www.euroscreen.com](http://www.euroscreen.com)). Results were expressed as relative light units. In brief, recombinant cell lines were stably transfected with plasmids encoding aequorin and CXCR3 and stimulated with CXCR3 ligand I-TAC or PT-gliadin. Calcium mobilization was measured by a luminescent signal. Calcium binding to the protein aequorin, a photoprotein that is composed of the apoprotein apoaequorin and a prosthetic group that is responsible for the emission of light, leads to a conformation change of the protein and subsequent emission of light. Activity is here determined as calcium release upon bind-

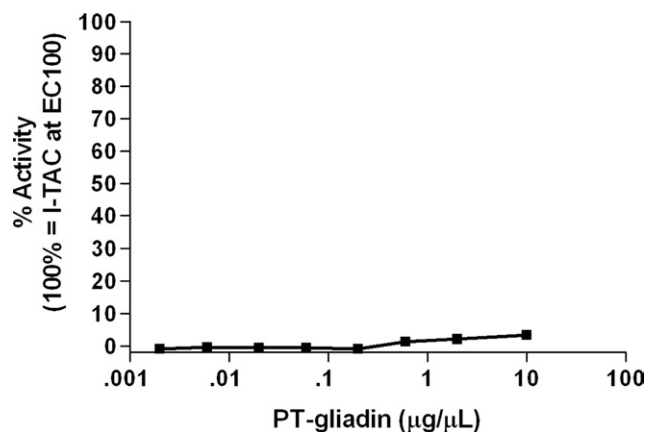

**Supplementary Figure 1.** Percent agonist activity of PT-gliadin measured with the Aequorin assay, relative to the agonist activity of I-TAC.

ing and its translation into emission of light. Supplementary Figure 1 shows the percent agonist activity of PT-gliadin measured with the aequorin assay, relative to the agonist activity of I-TAC, one of the natural ligands of CXCR3, which is known to induce calcium release after binding. PT-gliadin binding to CXCR3 did not induce calcium release.

#### **Binding Kinetic of 4026 Gliadin Synthetic Peptide to CXCR3**

To establish the specificity of binding of the synthetic peptides to CXCR3, HEK293T cells transfected with either empty vector or human CXCR3 were exposed to increasing concentrations (5.5 μmol/L to 44 μmol/L) of FITC-labeled CXCR3 binding synthetic peptide 4026. Binding was determined by flow cytometry analysis and expressed as mean fluorescence intensity (MFI). Supplementary Figure 2 shows the specific CXCR3 binding calculated as  $MFI_{CXCR3} - MFI_{Vector}$ . Our results demonstrated that FITC-4026 binds specifically to CXCR3 with a dissociation constant of 32 μmol/L. It is worthy to note

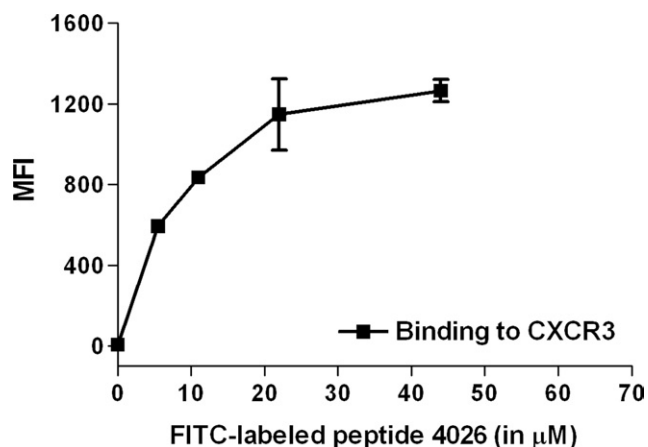

**Supplementary Figure 2.** Kinetic binding of gliadin synthetic peptide 4026 to CXCR3.

that peptide 4026 at a concentration of 4 μmol/L (that corresponds approximately to the  $ED_{50}$ ) induced a significant drop in TEER (Figure 6D).

#### **Immunofluorescence Microscopy**

Cells on slides were incubated with complete culture medium alone or stimulated with PT-gliadin (1 mg/mL) at 37°C in 5% CO<sub>2</sub> for 45 minutes. After stimulation, the slides were washed with PBS (pH 7.4), fixed in freshly prepared 4% paraformaldehyde in PBS for 20 minutes, and stained at room temperature. Slides were incubated with a primary rabbit anti-gliadin polyclonal Ab (1:2000; Sigma; St Louis, MO), goat anti-BSA Ab (1:2000; Biomedica, Foster City, CA), or PBS, followed by a secondary anti-rabbit or anti-goat IgG FITC-conjugated Ab (1:1000; Sigma). Next, slides were incubated with a primary mouse anti-CXCR3 (1:100, clone 49801; R&D, Minneapolis, MN) or isotype-matched control (1:100, clone 11711; R&D) mAb, followed by an anti-mouse IgG TRITC-labeled Ab (1:50; Sigma). Nuclei were stained with DAPI (1:30,000; Sigma) for 1–2 minutes. Slides were coverslipped using Prolong gold antifade reagent (Invitrogen, Carlsbad, CA) and analyzed on a Nikon Eclipse TE2000-E microscope. After fixation and after each incubation with antibodies (15 minutes each) or DAPI, the slides were washed 3 times with PBS.

#### **RNA Extraction and Real-time PCR Conditions**

For RNA extraction, CaCo-2 cells, grown in 25-cm<sup>2</sup> culture flasks, and intestinal biopsy specimens from CD patients and non-CD controls were dissolved and homogenized in 1 mL of Trizol Reagent (Life Technologies, Carlsbad, CA), and total RNA was isolated by chloroform extraction and isopropanol precipitation. RNA was dissolved in 50 μL RNase-free water. Complementary DNA (cDNA) was synthesized from 1 μg RNA per sample by reverse-transcriptase reaction using the high-capacity cDNA archive kit (Applied Biosystems, Foster City, CA). CXCR3 messenger RNA (mRNA) expression was quantified by real-time polymerase chain reaction (PCR) using TaqMan (Applied Biosystems). Specific primers for CXCR3 (hs00171041\_A1) and 18S (Hs99999901\_S1) were purchased from Applied Biosystems. Relative gene expression was calculated using the comparative  $\Delta C_t$  method (Applied Biosystems) with 18S as a housekeeping gene. The fold change in intestinal mRNA expression for CXCR3 in active CD patients and in mouse epithelium was relative to CXCR3 expression in the respective groups, ie, non-CD patients and mouse lamina propria, after normalization to 18S rRNA.

#### **Immunoprecipitation**

For immunoprecipitation of CXCR3 with the adaptor molecule MyD88, IEC6 cell lysates (1 mg total protein) obtained at increasing time intervals and in-

creasing PT-gliadin concentrations (from 0 to 1 mg/mL) were incubated with 50  $\mu$ L anti-CXCR3 mAb (1 hour), followed by an additional hour of incubation with protein G-agarose beads (50  $\mu$ L/sample; Sigma). The lysate-antibody-beads suspensions were then washed twice with lysis buffer. Laemmli buffer (30  $\mu$ L; Sigma) was added, and samples were boiled for 5 minutes. Samples were resolved on 8%–16% SDS-PAGE gradient gels (Invitrogen) in Tris/glycine/SDS buffer (135 V, 2 hours), and proteins were transferred to a nitrocellulose membrane (40 V, 1 hour). After blocking, the membrane was probed with a primary polyclonal rabbit anti-human MyD88 Ab (1:500; Zymed, San Francisco, CA), followed by incubation with a secondary horseradish peroxidase-labeled polyclonal

rabbit Ab (1:1000; Sigma). At the end of each incubation, blots were washed 3 times for 10 minutes in PBS/0.1% Tween 20 (Bio-Rad, Hercules, CA). Bands were detected with ECL Plus reagents (Amersham, Piscataway, NJ).

### References

1. Stables J, Green A, Marshall F, et al. A bioluminescent assay for agonist activity at potentially any G-protein-coupled receptor. *Anal Biochem* 1997;252:115–126.
  2. Morimoto M, Morimoto M, Zhao A, et al. Functional importance of regional differences in localized gene expression of receptors for IL-13 in murine gut. *J Immunol* 2006;176:491–495.
-
